# Supplementary material for: RuCo alloy trifunctional electrocatalysts with ratio-dependent activity for Zn–air batteries and self-powered water splitting
Source: Royal Society of Chemistry journal article supplement (doi:10.1039/d0cc07565e), 2021-01-01
Supplement: d0cc07565e1.pdf [file d0cc07565e1.pdf]

# Supporting Information

## **RuCo Alloy Trifunctional Electrocatalysts with Ratio-Dependent Activity for Zn-Air Batteries and Self-Powered Water Splitting**

Yu Pei,<sup>a,b</sup> Wangtao He,<sup>a</sup> Minmin Wang,<sup>c</sup> Jin Wang,<sup>c</sup> Tongming Sun,<sup>c</sup> Lanping Hu,<sup>c</sup>  
Jinlin Zhu,<sup>c</sup> Yanfeng Tan,<sup>c</sup> and Jiacheng Wang<sup>a,b\*</sup>

<sup>a</sup> State Key Laboratory of High-Performance Ceramics and Superfine Microstructure,  
Shanghai Institute of Ceramics, Chinese Academy of Sciences, 585 Heshuo Road,  
Shanghai 201899, China

<sup>b</sup> Center of Materials Science and Optoelectronics Engineering, University of Chinese  
Academy of Sciences, Beijing 100049, China

<sup>c</sup> College of Chemistry and Chemical Engineering, Nantong University, Nantong  
226019, China

\*Corresponding Author

\* **E-mail Address:** [jiacheng.wang@mail.sic.ac.cn](mailto:jiacheng.wang@mail.sic.ac.cn)

## **Experimental section**

### **Materials**

Cobaltous nitrate hexahydrate ( $\text{Co}(\text{NO}_3)_2 \cdot 6\text{H}_2\text{O}$ , 99%), Ruoodium (III) Chloride Hydr ( $\text{RuCl}_3$ ), Sodium hydroxide ( $\text{NaOH}$ ), Potassium hydroxide ( $\text{KOH}$ ,  $\geq 95\%$ ), and other chemicals used in the experiments were all purchased commercially (Aladdin, China). Nafion D-520 dispersion (5 wt%) was purchased from Alfa Aesar China. The Milli-Q water was obtained from the Milli-Q System. All the materials were used as received without further purification.

### **Synthesis of RuCo/NPC, Ru/NPC and Co/NPC catalysts**

The RuCo/NPC were synthesized by the simple template method. In the typical synthesis, the ground potato mash (10 g) was dissolved in 40 ml of deionized water with  $\text{SiO}_2$  (5 g) as a template and stirred for 30 min. Then the  $\text{Co}(\text{NO}_3)_2 \cdot 6\text{H}_2\text{O}$ ,  $\text{RuCl}_3$  were added into the system as Co and Ru source. The amount of Co and Ru is 0.225 g. The mixture was stirred at 80 °C until evenly mixed. After this, the mixture was calcined at 800 °C under Ar atmosphere for 2 h. Then, after being fully carbonized, soak the material in 2 M  $\text{NaOH}$  at 80 °C for removing the  $\text{SiO}_2$  template to obtain the RuCo/NPC catalyst. By simply adjusting the initial mass ratio of RuCo, catalytic materials with different properties can be obtained. The mass ratio of Ru and Co source are respectively 3:7, 5:5, 7:3. The corresponding sample is marked as RuCo/NPC (3:7), RuCo/NPC (5:5) and RuCo/NPC (7:3). The Ru/NPC and Co/NPC were fabricated by a similar method without Ru source or Co source.

### **Preparation of Pt/C and $\text{RuO}_2$ electrodes**

The Pt/C and RuO<sub>2</sub> electrodes were prepared by a typical method. Briefly, commercial Pt/C (5 mg) or RuO<sub>2</sub> (5 mg) was dispersed in a solution of 0.5 mL deionized water, 0.5 mL ethanol, and 20  $\mu$ L 5% Nafion solution. That mixture was then ultrasonicated for 20 min to form a homogeneous catalyst ink. And then 20  $\mu$ L of the ink was loaded onto the glassy carbon electrode. After that, the electrode was placed in an oven and dried for further testing.

### **Characterizations**

The scanning electron microscopy (SEM) and elemental mapping images were obtained using Magellan400, FEI. The X-ray diffraction (XRD) patterns were recorded on a Bruker D8 ADVANCE with Cu K $\alpha$  radiation (40 kV, 30 mA,  $\lambda = 1.54 \text{ \AA}$ ). The X-ray photoelectron spectroscopy (XPS) spectra were obtained using an IncaX-max50, Oxford. The JEOL JEM 2100F was employed to acquire the transmission electron microscopy (TEM) and high-resolution transmission electron microscopy (HR-TEM) images. Nitrogen adsorption-desorption isotherms were measured at -196  $^{\circ}$ C with an ASAP 2010 Surface Area and Pore Size Analyzer System (Micromeritics, Norcross, GA). The specific surface areas were obtained using the multipoint Brunauer-Emmett-Teller (BET) method.

### **Electrochemical measurements.**

All electrochemical measurements were carried out in a typical three-electrode system with a CHI-760E electrochemical workstation (CHI Instruments, Shanghai, China) at room temperature. Graphite rod was used as the counter electrode, and mercury/mercuric oxide (Hg/HgO) electrode as the reference electrode, the glassy

carbon electrode with catalysts as working electrode. All potentials in this study were converted into a reversible hydrogen electrode (RHE) scale according to:  $E(\text{RHE}) = E(\text{Hg}/\text{HgO}) + 0.098 + 0.059 \times \text{pH}$ . The polarization curves were recorded in 1M KOH with a scan rate of  $2 \text{ mV s}^{-1}$  and corrected for the  $iR$  contribution within the cell.  $iR$  drop was compensated at 85% for OER and at 90% for HER. Electrochemical impedance spectroscopy (EIS) was performed at -50 mV overpotential with frequency from 10 MHz to 100 KHz. The electrochemically active surface area (ECSA) was estimated by measuring the capacitive current associated with double-layer charging ( $C_{dl}$ ) from scan-rate dependence of cyclic voltammetry (CV).

Rotating ring disk electrode (RRDE) measurement was conducted to determine the electron transfer number ( $n$ ) and peroxide yield for ORR. Linear sweep voltammetry (LSV) from 0.3 V to 1.0 V (vs. RHE) was applied on disk electrode at a scan rate of  $5 \text{ mV s}^{-1}$  with a rotation speed of 1600 rpm. Corresponding  $n$  and  $\text{H}_2\text{O}_2$  yield were calculated by the following equations:

$$n = \frac{4I_D}{I_D + (I_R/N)} \quad (1)$$

$$\% \text{H}_2\text{O}_2 = 100 \frac{2I_R/N}{I_D + (I_R/N)} \quad (2)$$

where  $I_D$  is the Faradaic current at the disk,  $I_R$  the Faradaic current at the ring and  $N$  is the  $\text{H}_2\text{O}_2$  collection coefficient at the ring ( $n=0.37$ ).

For construction of Zn-O<sub>2</sub> battery, the prepared RuCo/NPC catalyst (RuCo/NPC (5:5) : RuCo/NPC (7:3)=1:1) was uniformly coated on carbon paper as the cathode ( $\sim 1 \text{ mg cm}^{-2}$ ). A polished Zn plate (0.3 mm) was used as the anode and  $6 \text{ mol L}^{-1}$  KOH

solution with  $0.2 \text{ mol L}^{-1} \text{ Zn(OAc)}_2$  was used as electrolyte. For comparison, a mixture of Pt/C and  $\text{RuO}_2$  (mass ratio of 1:1) with the same loading was coated onto carbon paper as cathode. The electrochemical performances of ZABs, such as charge/discharge performance were tested using a PINE electrochemical workstation (Pine Research Instrumentation, USA). And cycling ability tests and specific capacities tests were recorded by a Land CT2001A system, and each discharge and charge period were set to be 30 min. To evaluate the overall water-splitting activity, the electrolyzer device was assembled by two identical electrodes (RuCo/NPC (5:5) as cathode and RuCo/NPC (7:3) as anode) coated on carbon paper with a mass loading of  $1 \text{ mg cm}^{-2}$ , followed by measuring in 1 M KOH. The LSV curves were collected at a scan rate of  $2 \text{ mV s}^{-1}$  with iR compensation.

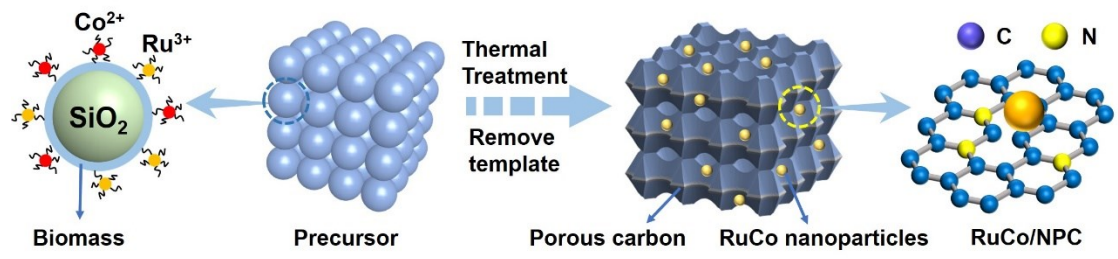

**Figure S1.** Schematic illustration on synthesis of trifunctional RuCo/NPC electrocatalyst.

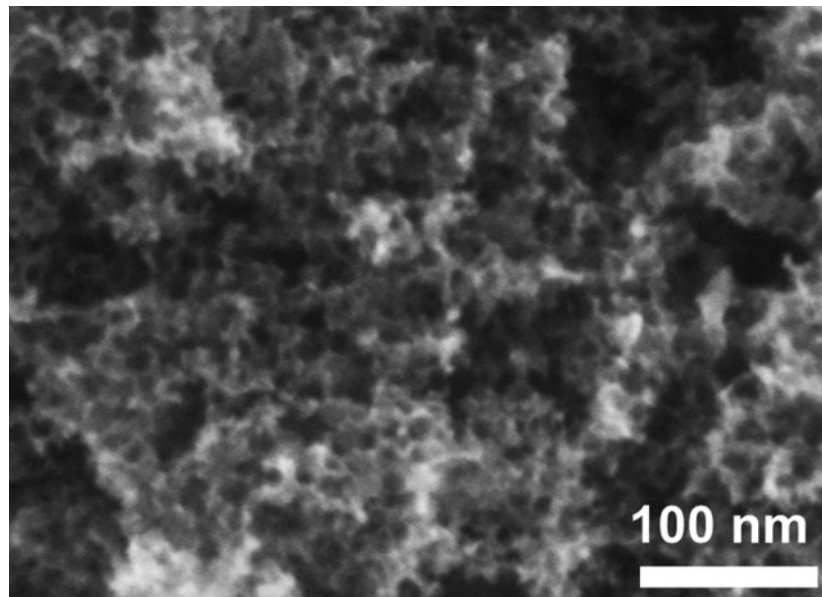

**Figure S2.** The SEM image of RuCo/NPC catalyst.

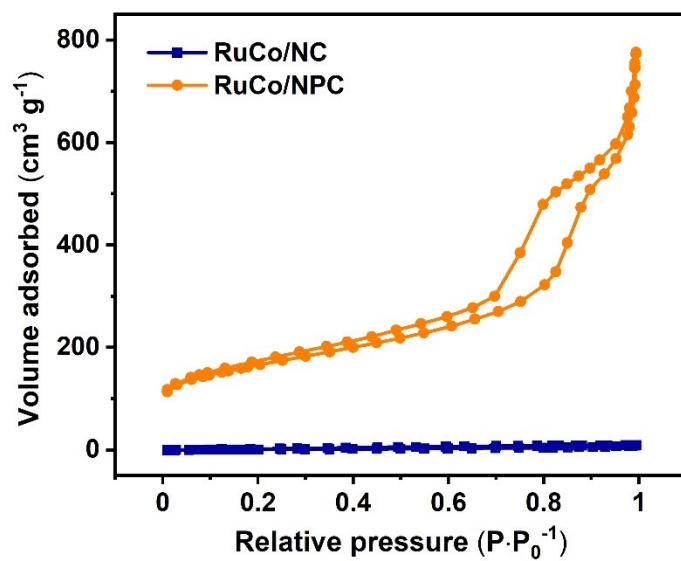

**Figure S3.** N<sub>2</sub> sorption isotherms of RuCo/NPC and RuCo/NC at -196°C

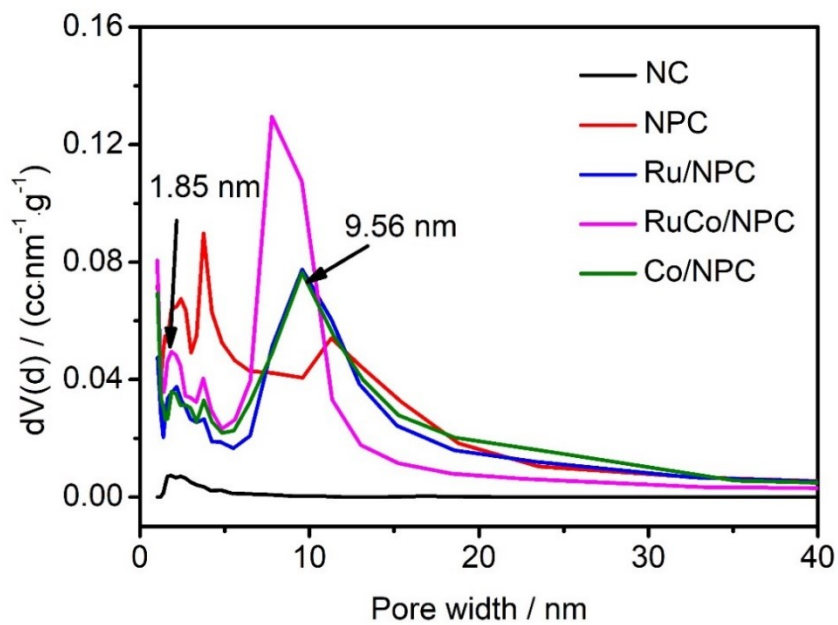

**Figure S4.** The pore size distribution of RuCo/NPC.

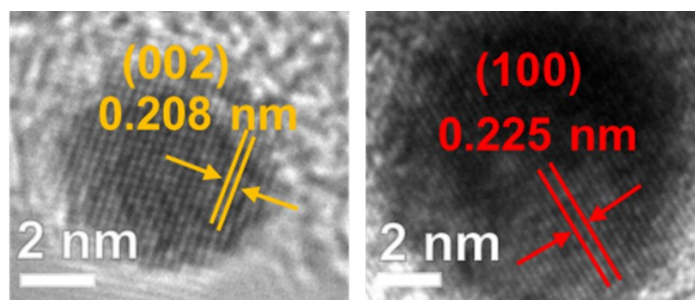

**Figure S5.** HRTEM images of RuCo alloy nanoparticle.

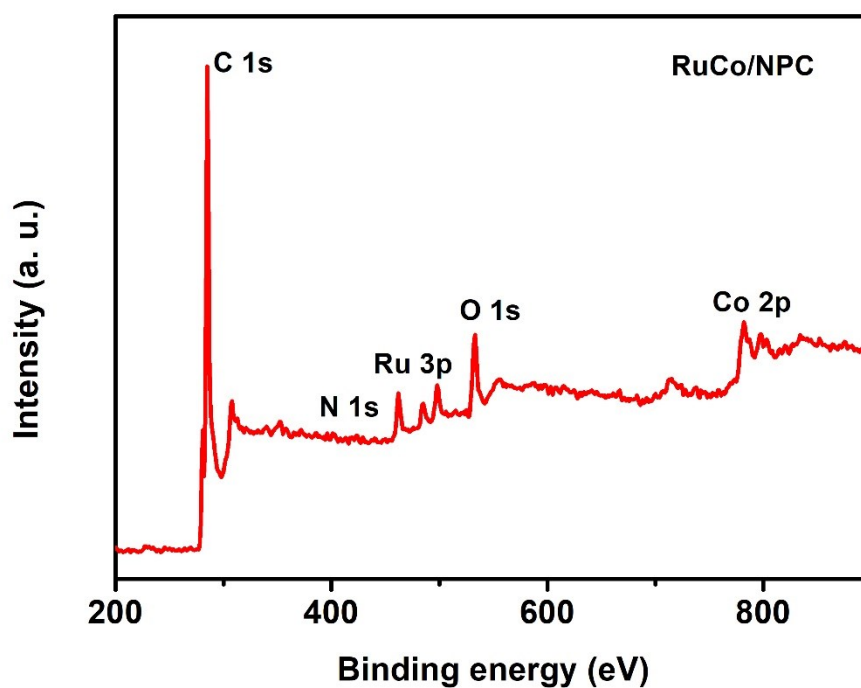

**Figure S6.** The XPS spectrum of RuCo/NPC.



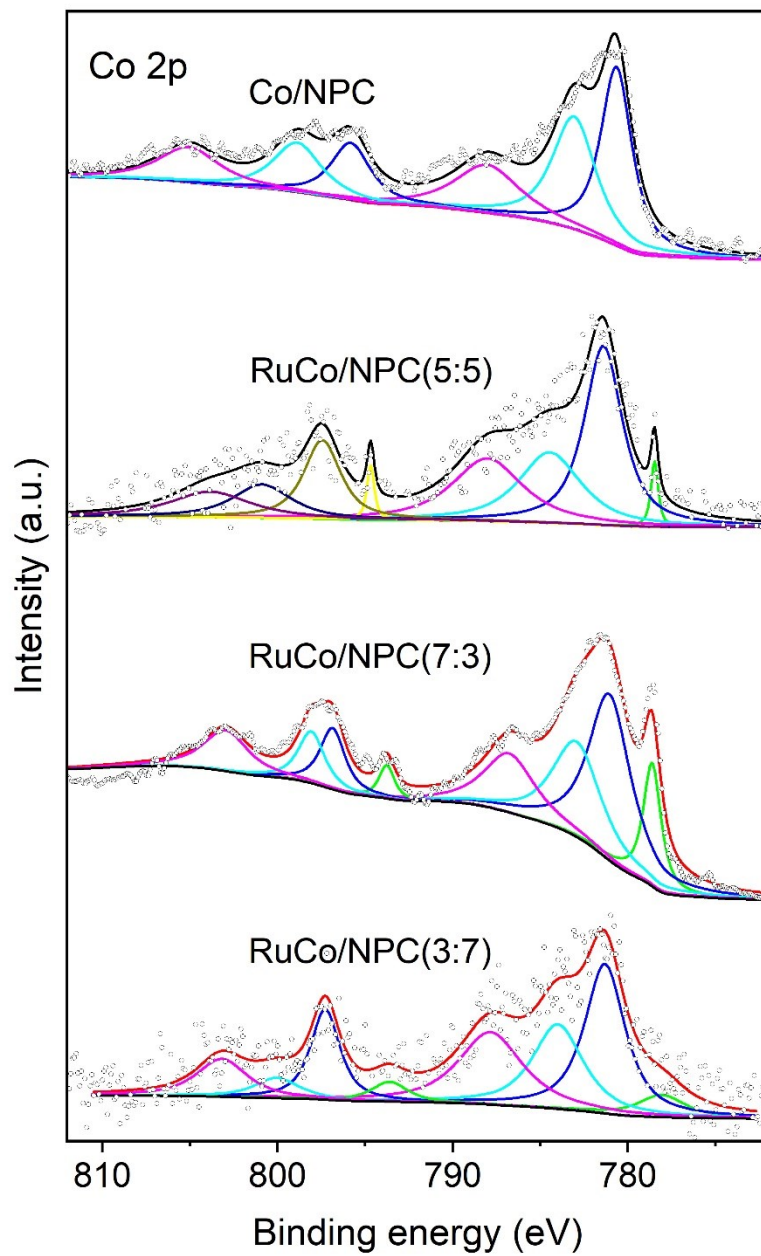

**Figure S7.** XPS spectra of Co 2p of different RuCo/NPC samples and Co/NPC.

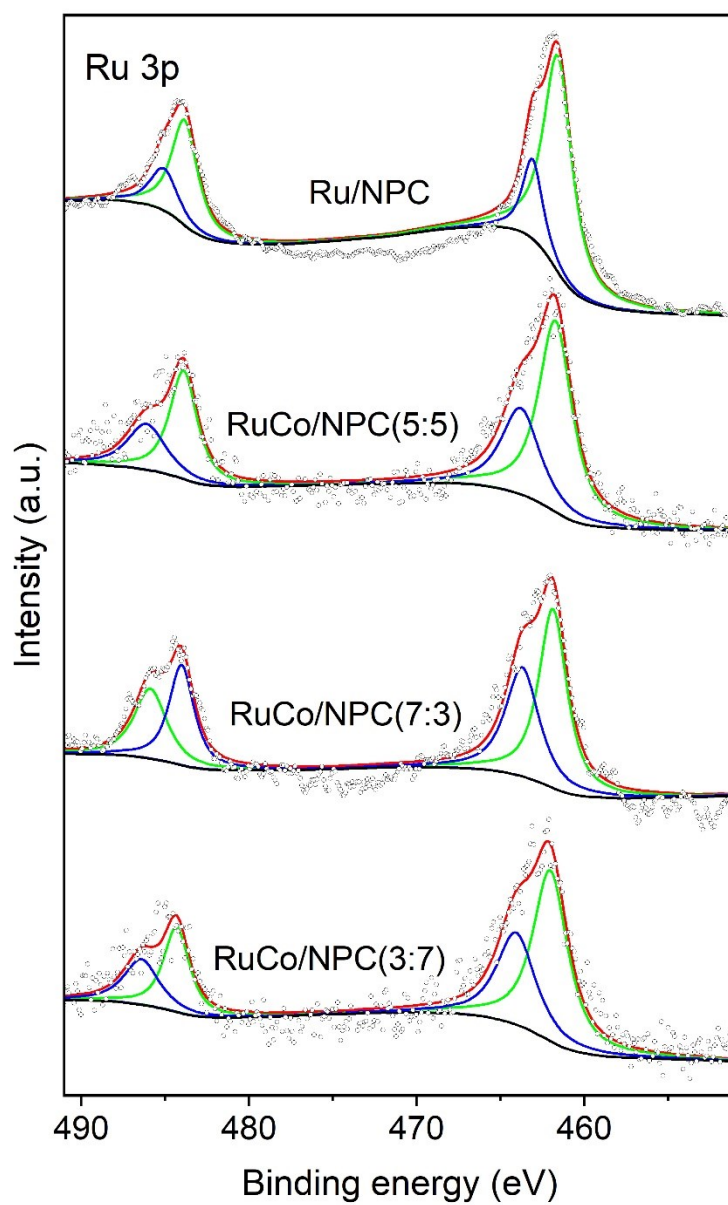

**Figure S8.** XPS spectra of Ru 3p of different RuCo/NPC samples and Co/NPC.

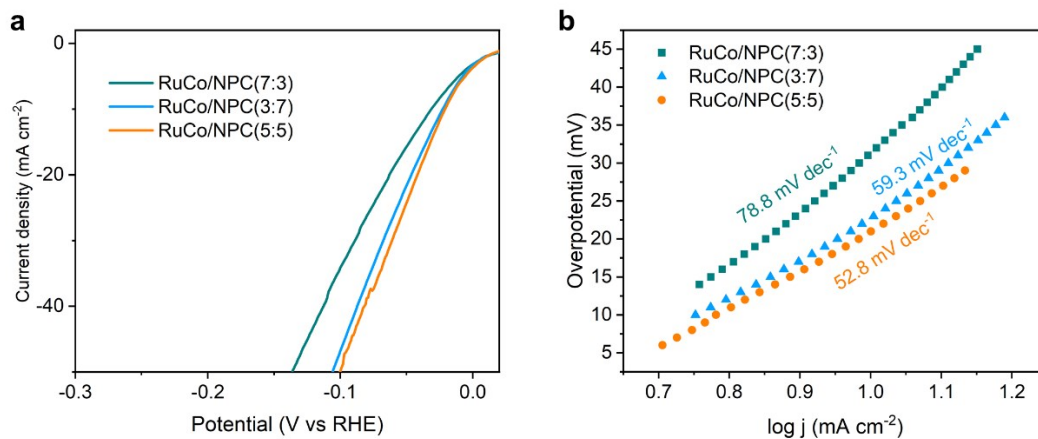

**Figure S9.** a) HER polarization curves of RuCo/NPC(3:7), RuCo/NPC(7:3) and RuCo/NPC(5:5). b) Corresponding Tafel plots for HER.

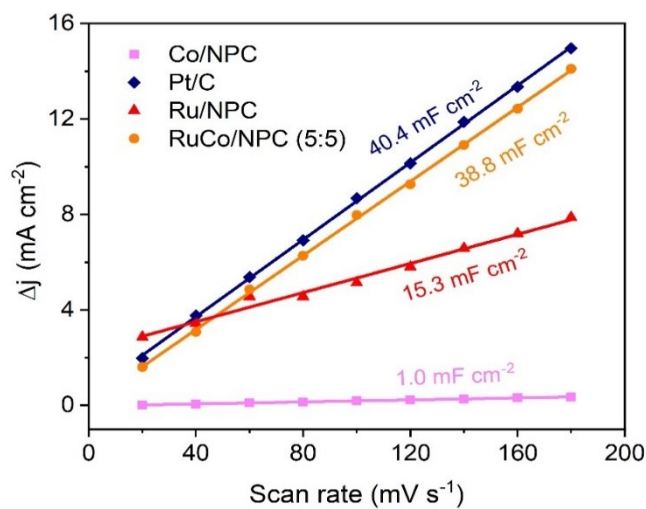

**Figure S10.** Double layer capacity of Ru/NPC, Co/NPC, Pt/C and RuCo/NPC calculated from CV with different scan rate.

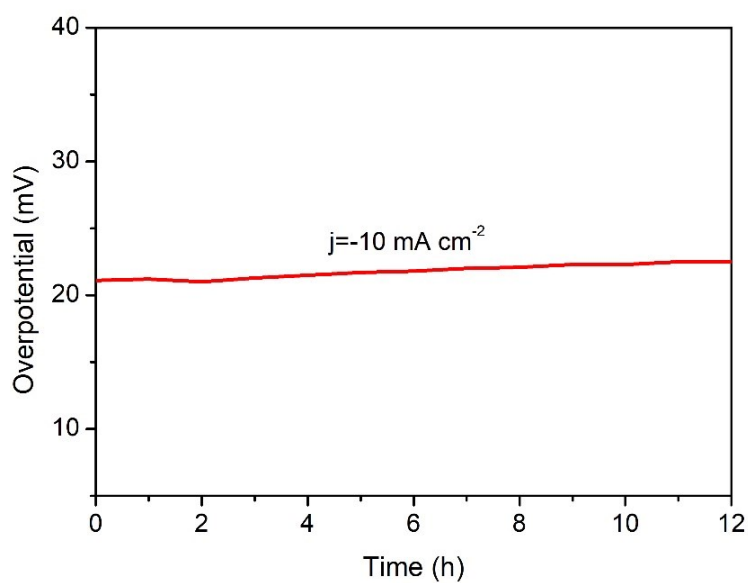

**Figure S11.** The HER stability of RuCo/NPC (5:5) at  $10 \text{ mA cm}^{-2}$  for 12 h.

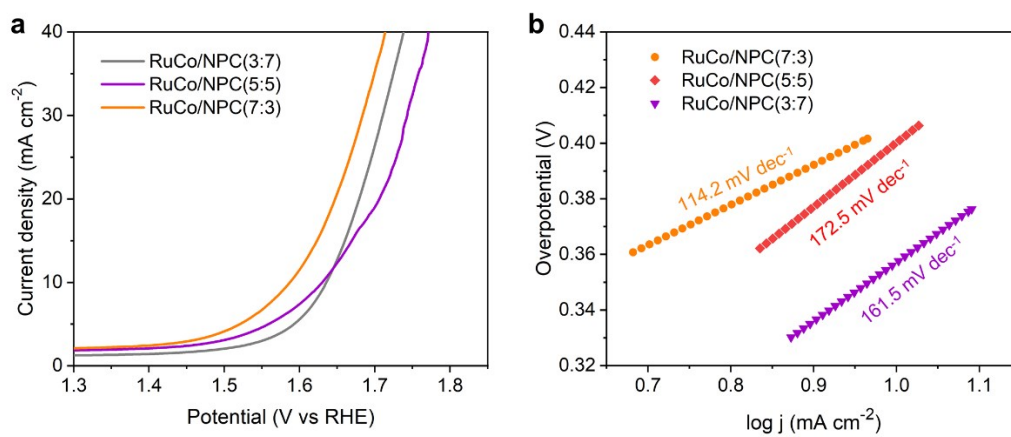

**Figure S12.** a) OER polarization curves of RuCo/NPC(3:7), RuCo/NPC(7:3) and RuCo/NPC(5:5). b) Corresponding Tafel plots for OER.

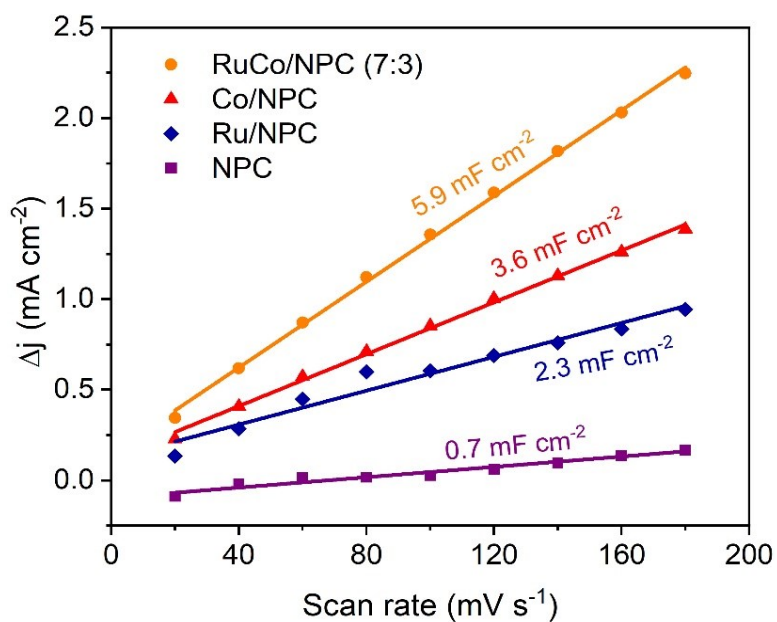

**Figure S13.** Double layer capacity of Co/NPC, Ru/NPC, NPC and RuCo/NPC (7:3) calculated from CV with different scan rate.

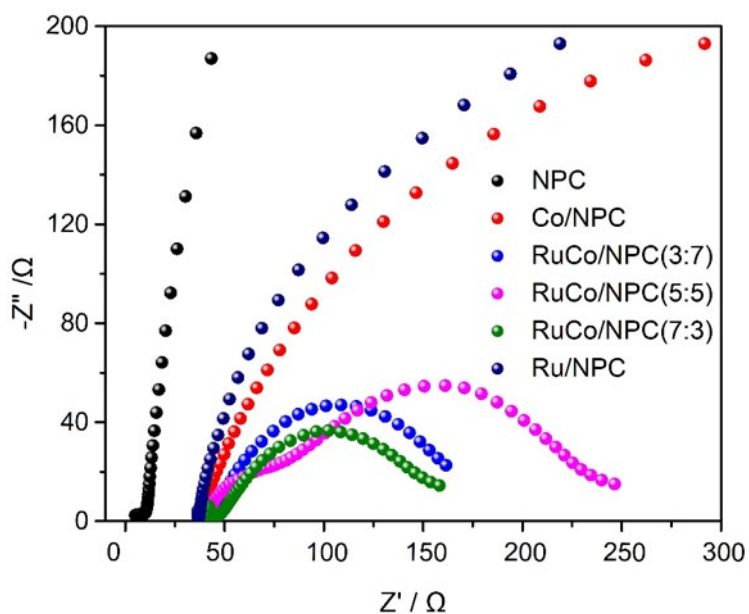

**Figure S14.** Nyquist plots of RuCo/NPC samples, Ru/NPC, Co/NPC and RuCo/NPC.

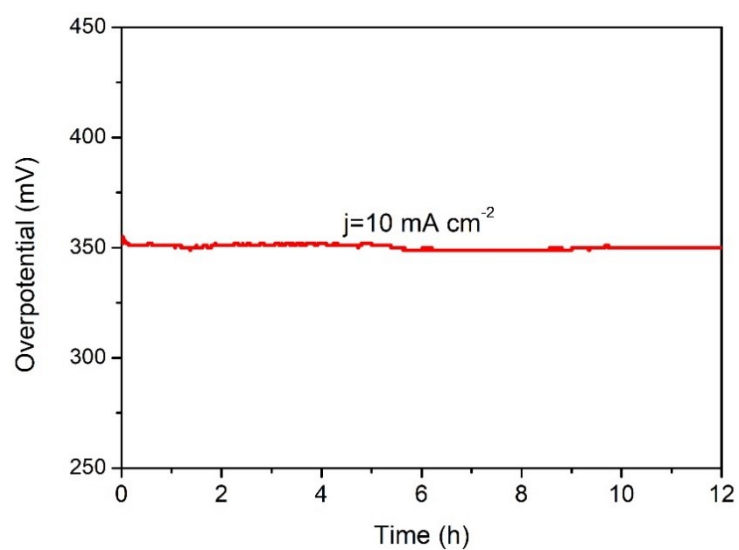

**Figure S15.** The OER stability of RuCo/NPC (7:3) at  $10 \text{ mA cm}^{-2}$  for 12 h.

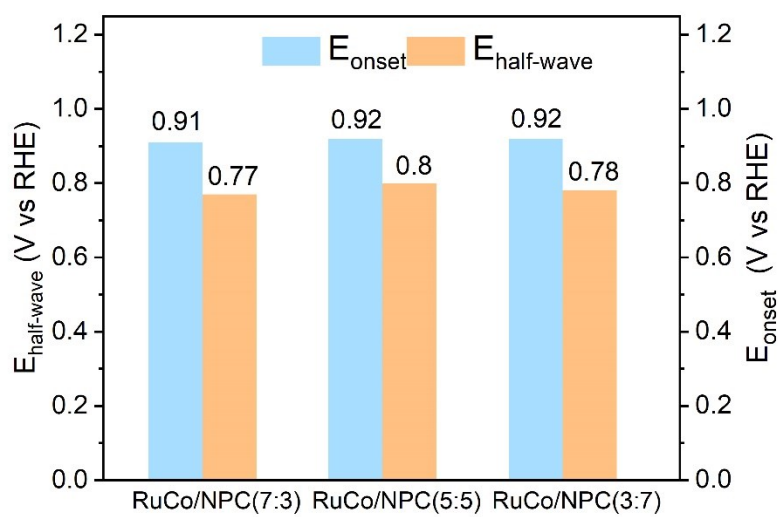

**Figure S16.** Onset potential and half-wave potential of RuCo/NPC (7:3) RuCo/NPC (3:7) and RuCo/NPC (5:5).

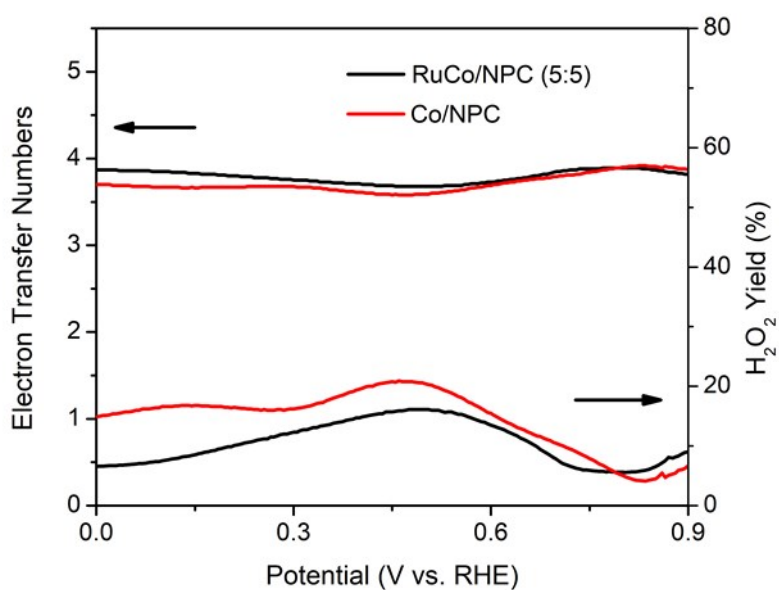

**Figure S17.** Number of electrons transferred and peroxide yields of Co/NPC and RuCo/NPC (5:5).

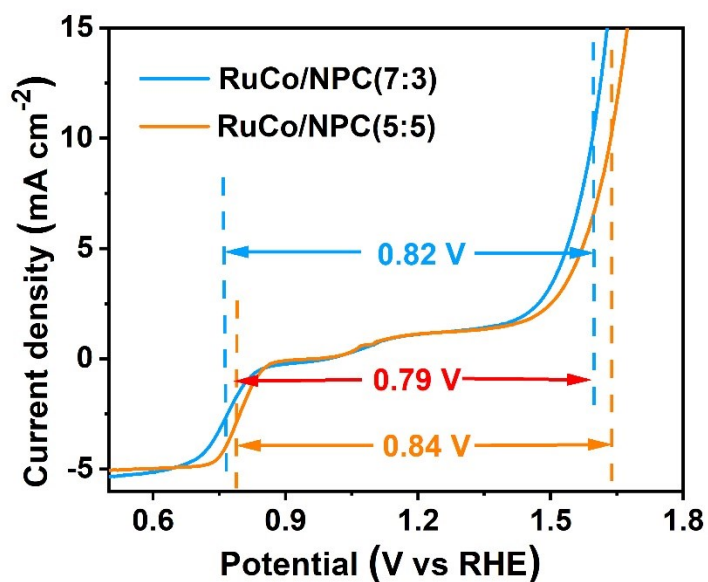

**Figure S18.** LSV curves of the RuCo/NPC (5:5) and RuCo/NPC (7:3) catalysts for the ORR and OER.

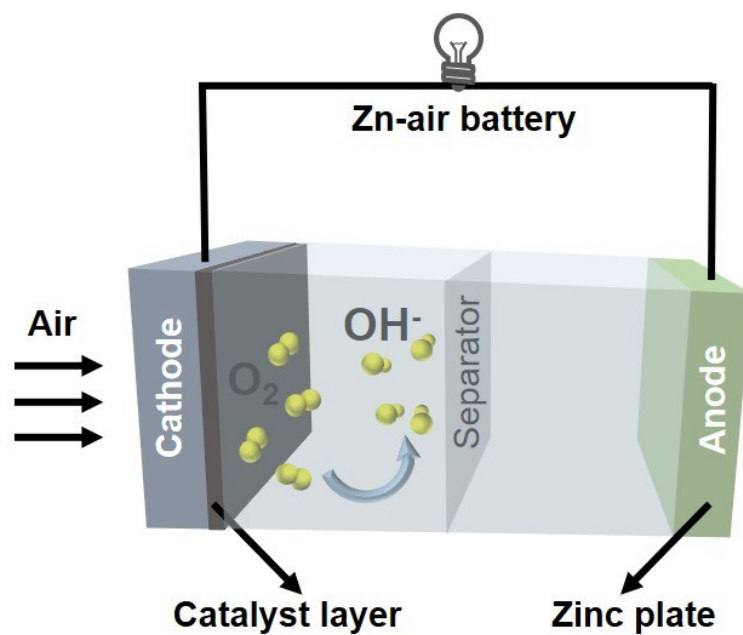

**Figure S19.** Schematic illustration of self-assembled zinc-air battery (ZAB).

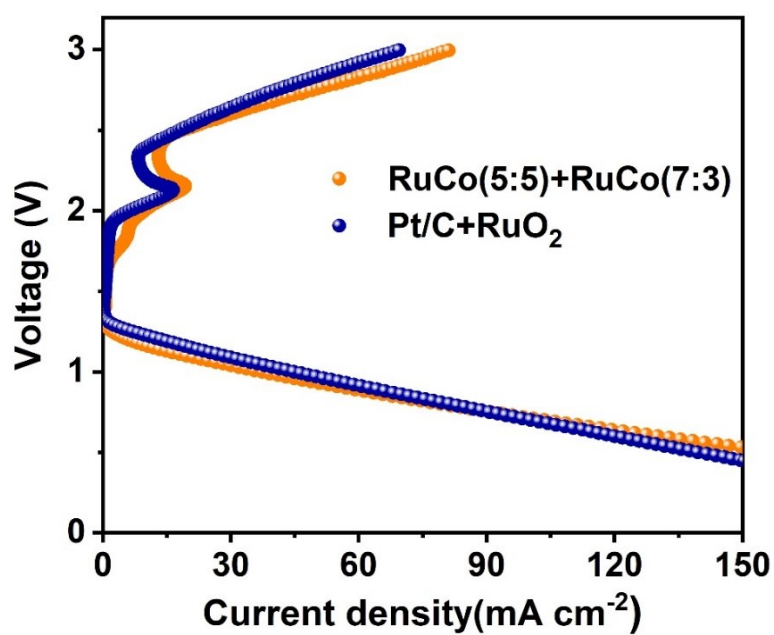

**Figure S20.** Charge and discharge polarization curves and corresponding power density of ZABs based on RuCo/NPC and Pt/C+RuO<sub>2</sub>



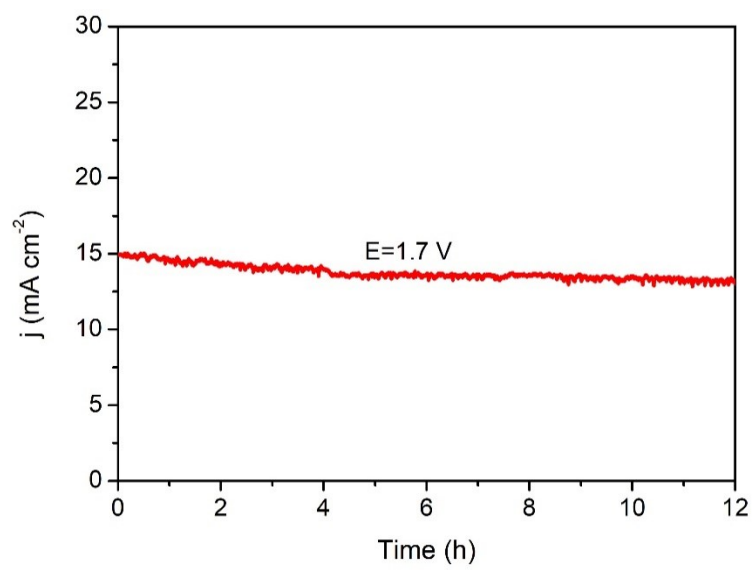

**Figure S21.** The water splitting durability of RuCo/NPC catalysts at 1.7 V for 12 h.
